# Supplementary material for: An ICP index for ICP-MS determinations – new selection rules for internal standards in ICP-MS determinations and carbon enhancement effect
Source: Royal Society of Chemistry journal article supplement (doi:10.1039/c7ja00132k), 2017-01-01
Supplement: c7ja00132k1.pdf [file c7ja00132k1.pdf]

## Supplementary Information

S1 ICP-index list of carbon for all elements (calculated values: in atomic number order) and its calculation modelling data.

| Element | ICP-index             | Element | ICP-index          | Element | ICP-index |
|---------|-----------------------|---------|--------------------|---------|-----------|
| H       | $2.03 \times 10^5$    | As      | 24.29              | Tb      | 1.90      |
| He      | $2.90 \times 10^{13}$ | Se      | 44.87              | Dy      | 1.88      |
| Li      | 4.67                  | Br      | 597.89             | Ho      | 1.93      |
| Be      | 21.39                 | Kr      | $9.34 \times 10^3$ | Er      | 1.94      |
| B       | 34.73                 | Rb      | 1.15               | Tm      | 2.02      |
| C       | $1.26 \times 10^3$    | Sr      | 2.20               | Yb      | 2.04      |
| N       | $1.70 \times 10^5$    | Y       | 2.57               | Lu      | 1.82      |
| O       | $1.89 \times 10^5$    | Zr      | 2.86               | Hf      | 2.48      |
| F       | $6.12 \times 10^7$    | Nb      | 3.12               | Ta      | 3.01      |
| Ne      | $2.95 \times 10^8$    | Mo      | 3.51               | W       | 3.36      |
| Na      | 3.18                  | Tc      | 3.86               | Re      | 3.50      |
| Mg      | 7.74                  | Ru      | 4.09               | Os      | 4.56      |
| Al      | 8.45                  | Rh      | 4.39               | Ir      | 6.54      |
| Si      | 14.25                 | Pd      | 5.16               | Pt      | 6.69      |
| P       | 67.47                 | Ag      | 4.85               | Au      | 8.95      |
| S       | 197.10                | Cd      | 6.57               | Hg      | 15.68     |
| Cl      | 649.44                | In      | 3.81               | Tl      | 3.45      |
| Ar      | $3.38 \times 10^5$    | Sn      | 5.57               | Pb      | 4.33      |
| K       | 1.60                  | Sb      | 8.91               | Bi      | 4.98      |
| Ca      | 3.38                  | Te      | 12.68              | Po      | 7.42      |
| Sc      | 3.92                  | I       | 44.34              | At      | 14.63     |
| Ti      | 4.38                  | Xe      | 274.72             | Rn      | 25.00     |
| V       | 4.52                  | Cs      | 0.79               | Fr      | 0.93      |
| Cr      | 4.77                  | Ba      | 1.41               | Ra      | 1.60      |
| Mn      | 5.57                  | La      | 2.39               | Ac      | 1.95      |
| Fe      | 6.26                  | Ce      | 2.60               | Th      | 2.73      |
| Co      | 6.59                  | Pr      | 1.54               | Pa      | 2.54      |
| Ni      | 6.78                  | Nd      | 2.13               | U       | 2.77      |
| Cu      | 7.14                  | Pm      | 2.17               | Np      | 2.82      |
| Zn      | 10.99                 | Sm      | 1.67               | Pu      | 2.71      |
| Ga      | 5.60                  | Eu      | 1.77               | Am      | 2.67      |
| Ge      | 9.07                  | Gd      | 1.88               | Cm      | 2.69      |

| Element | Atomic Radii (m) | Atomic mass | k        | T (K) | p (Pa) | CRC handbook 1st IP (eV) | Saha equation |
|---------|------------------|-------------|----------|-------|--------|--------------------------|---------------|
| H       | 5.30E-11         | 1.01        | 1.38E-23 | 6680  | 133    | 13.60                    | 0.0004        |
| He      | 3.10E-11         | 4.00        | 1.38E-23 | 6680  | 133    | 24.59                    | 0.0000        |
| Li      | 1.67E-10         | 6.94        | 1.38E-23 | 6680  | 133    | 5.39                     | 0.9985        |
| Be      | 1.12E-10         | 9.01        | 1.38E-23 | 6680  | 133    | 9.32                     | 0.7536        |
| B       | 8.70E-11         | 10.81       | 1.38E-23 | 6680  | 133    | 8.30                     | 0.6203        |
| C       | 6.70E-11         | 12.01       | 1.38E-23 | 6680  | 133    | 11.26                    | 0.0345        |
| N       | 5.60E-11         | 14.01       | 1.38E-23 | 6680  | 133    | 14.53                    | 0.0004        |
| O       | 4.80E-11         | 16.00       | 1.38E-23 | 6680  | 133    | 13.62                    | 0.0004        |
| F       | 4.20E-11         | 19.00       | 1.38E-23 | 6680  | 133    | 17.42                    | 0.0000        |
| Ne      | 3.80E-11         | 20.18       | 1.38E-23 | 6680  | 133    | 21.56                    | 0.0000        |
| Na      | 1.90E-10         | 22.99       | 1.38E-23 | 6680  | 133    | 5.14                     | 0.9991        |
| Mg      | 1.45E-10         | 24.31       | 1.38E-23 | 6680  | 133    | 7.65                     | 0.9825        |
| Al      | 1.18E-10         | 26.98       | 1.38E-23 | 6680  | 133    | 5.99                     | 0.9892        |
| Si      | 1.11E-10         | 28.09       | 1.38E-23 | 6680  | 133    | 8.15                     | 0.8790        |
| P       | 9.80E-11         | 30.97       | 1.38E-23 | 6680  | 133    | 10.49                    | 0.2879        |
| S       | 8.80E-11         | 32.07       | 1.38E-23 | 6680  | 133    | 10.36                    | 0.1147        |
| Cl      | 7.90E-11         | 35.45       | 1.38E-23 | 6680  | 133    | 12.97                    | 0.0504        |
| Ar      | 7.10E-11         | 39.95       | 1.38E-23 | 6680  | 133    | 15.76                    | 0.0001        |
| K       | 2.43E-10         | 39.10       | 1.38E-23 | 6680  | 133    | 4.34                     | 0.9997        |
| Ca      | 1.94E-10         | 40.08       | 1.38E-23 | 6680  | 133    | 6.11                     | 0.9986        |
| Sc      | 1.84E-10         | 44.96       | 1.38E-23 | 6680  | 133    | 6.56                     | 0.9971        |
| Ti      | 1.76E-10         | 47.87       | 1.38E-23 | 6680  | 133    | 6.83                     | 0.9949        |
| V       | 1.71E-10         | 50.94       | 1.38E-23 | 6680  | 133    | 6.75                     | 0.9923        |
| Cr      | 1.66E-10         | 52.00       | 1.38E-23 | 6680  | 133    | 6.77                     | 0.9889        |
| Mn      | 1.61E-10         | 54.94       | 1.38E-23 | 6680  | 133    | 7.43                     | 0.9710        |
| Fe      | 1.56E-10         | 55.85       | 1.38E-23 | 6680  | 133    | 7.90                     | 0.9677        |
| Co      | 1.52E-10         | 58.93       | 1.38E-23 | 6680  | 133    | 7.88                     | 0.9483        |
| Ni      | 1.49E-10         | 58.69       | 1.38E-23 | 6680  | 133    | 7.64                     | 0.9255        |
| Cu      | 1.45E-10         | 63.55       | 1.38E-23 | 6680  | 133    | 7.73                     | 0.9159        |
| Zn      | 1.42E-10         | 65.38       | 1.38E-23 | 6680  | 133    | 9.39                     | 0.7450        |
| Ga      | 1.36E-10         | 69.72       | 1.38E-23 | 6680  | 133    | 6.00                     | 0.9900        |
| Ge      | 1.25E-10         | 72.64       | 1.38E-23 | 6680  | 133    | 7.90                     | 0.9164        |
| As      | 1.14E-10         | 74.92       | 1.38E-23 | 6680  | 133    | 9.79                     | 0.4887        |
| Se      | 1.03E-10         | 78.96       | 1.38E-23 | 6680  | 133    | 9.75                     | 0.3053        |
| Br      | 9.40E-11         | 79.90       | 1.38E-23 | 6680  | 133    | 11.81                    | 0.0318        |
| Kr      | 8.80E-11         | 83.80       | 1.38E-23 | 6680  | 133    | 14.00                    | 0.0026        |
| Rb      | 2.65E-10         | 85.47       | 1.38E-23 | 6680  | 133    | 4.18                     | 0.9998        |
| Sr      | 2.19E-10         | 87.62       | 1.38E-23 | 6680  | 133    | 5.69                     | 0.9992        |
| Y       | 2.12E-10         | 88.91       | 1.38E-23 | 6680  | 133    | 6.22                     | 0.9899        |
| Zr      | 2.06E-10         | 91.22       | 1.38E-23 | 6680  | 133    | 6.63                     | 0.9931        |
| Nb      | 1.98E-10         | 92.91       | 1.38E-23 | 6680  | 133    | 6.76                     | 0.9894        |

|    |          |        |          |      |     |       |        |
|----|----------|--------|----------|------|-----|-------|--------|
| Mo | 1.90E-10 | 95.96  | 1.38E-23 | 6680 | 133 | 7.09  | 0.9854 |
| Tc | 1.83E-10 | 99.00  | 1.38E-23 | 6680 | 133 | 7.28  | 0.9750 |
| Ru | 1.78E-10 | 101.10 | 1.38E-23 | 6680 | 133 | 7.36  | 0.9699 |
| Rh | 1.73E-10 | 102.90 | 1.38E-23 | 6680 | 133 | 7.46  | 0.9587 |
| Pd | 1.69E-10 | 106.40 | 1.38E-23 | 6680 | 133 | 8.34  | 0.9421 |
| Ag | 1.65E-10 | 107.90 | 1.38E-23 | 6680 | 133 | 7.58  | 0.9445 |
| Cd | 1.61E-10 | 112.40 | 1.38E-23 | 6680 | 133 | 8.99  | 0.8543 |
| In | 1.56E-10 | 114.80 | 1.38E-23 | 6680 | 133 | 5.79  | 0.9942 |
| Sn | 1.45E-10 | 118.70 | 1.38E-23 | 6680 | 133 | 7.34  | 0.9672 |
| Sb | 1.33E-10 | 121.80 | 1.38E-23 | 6680 | 133 | 8.61  | 0.8107 |
| Te | 1.23E-10 | 127.60 | 1.38E-23 | 6680 | 133 | 9.01  | 0.6674 |
| I  | 1.15E-10 | 126.90 | 1.38E-23 | 6680 | 133 | 10.45 | 0.2465 |
| Xe | 1.08E-10 | 131.30 | 1.38E-23 | 6680 | 133 | 12.13 | 0.0504 |
| Cs | 2.98E-10 | 132.90 | 1.38E-23 | 6680 | 133 | 3.89  | 0.9998 |
| Ba | 2.53E-10 | 137.30 | 1.38E-23 | 6680 | 133 | 5.21  | 0.9996 |
| La | 1.95E-10 | 138.90 | 1.38E-23 | 6680 | 133 | 5.58  | 0.9991 |
| Ce | 1.85E-10 | 140.10 | 1.38E-23 | 6680 | 133 | 5.54  | 0.9971 |
| Pr | 2.47E-10 | 140.90 | 1.38E-23 | 6680 | 133 | 5.47  | 0.9985 |
| Nd | 2.06E-10 | 144.20 | 1.38E-23 | 6680 | 133 | 5.53  | 0.9971 |
| Pm | 2.05E-10 | 145.00 | 1.38E-23 | 6680 | 133 | 5.58  | 0.9991 |
| Sm | 2.38E-10 | 150.40 | 1.38E-23 | 6680 | 133 | 5.64  | 0.9992 |
| Eu | 2.31E-10 | 152.00 | 1.38E-23 | 6680 | 133 | 5.68  | 0.9992 |
| Gd | 2.33E-10 | 157.30 | 1.38E-23 | 6680 | 133 | 6.15  | 0.9938 |
| Tb | 2.25E-10 | 158.90 | 1.38E-23 | 6680 | 133 | 5.86  | 0.9942 |
| Dy | 2.28E-10 | 162.50 | 1.38E-23 | 6680 | 133 | 5.94  | 0.9892 |
| Ho | 2.26E-10 | 164.90 | 1.38E-23 | 6680 | 133 | 6.02  | 0.9892 |
| Er | 2.26E-10 | 167.30 | 1.38E-23 | 6680 | 133 | 6.11  | 0.9938 |
| Tm | 2.22E-10 | 168.90 | 1.38E-23 | 6680 | 133 | 6.18  | 0.9938 |
| Yb | 2.22E-10 | 173.10 | 1.38E-23 | 6680 | 133 | 6.25  | 0.9899 |
| Lu | 2.17E-10 | 175.00 | 1.38E-23 | 6680 | 133 | 5.43  | 0.9985 |
| Hf | 2.08E-10 | 178.50 | 1.38E-23 | 6680 | 133 | 6.83  | 0.9889 |
| Ta | 2.00E-10 | 180.90 | 1.38E-23 | 6680 | 133 | 7.55  | 0.9604 |
| W  | 1.93E-10 | 183.80 | 1.38E-23 | 6680 | 133 | 7.86  | 0.9486 |
| Re | 1.88E-10 | 186.20 | 1.38E-23 | 6680 | 133 | 7.83  | 0.9454 |
| Os | 1.85E-10 | 190.20 | 1.38E-23 | 6680 | 133 | 8.44  | 0.7986 |
| Ir | 1.80E-10 | 192.20 | 1.38E-23 | 6680 | 133 | 8.97  | 0.6183 |
| Pt | 1.77E-10 | 195.10 | 1.38E-23 | 6680 | 133 | 8.96  | 0.6183 |
| Au | 1.74E-10 | 197.00 | 1.38E-23 | 6680 | 133 | 9.23  | 0.4887 |
| Hg | 1.71E-10 | 200.60 | 1.38E-23 | 6680 | 133 | 10.44 | 0.3231 |
| Tl | 1.56E-10 | 204.40 | 1.38E-23 | 6680 | 133 | 6.11  | 0.9938 |
| Pb | 1.54E-10 | 207.20 | 1.38E-23 | 6680 | 133 | 7.42  | 0.9793 |
| Bi | 1.43E-10 | 209.00 | 1.38E-23 | 6680 | 133 | 7.29  | 0.9414 |
| Po | 1.35E-10 | 210.00 | 1.38E-23 | 6680 | 133 | 8.41  | 0.7986 |
| At | 1.27E-10 | 210.00 | 1.38E-23 | 6680 | 133 | 9.23  | 0.4887 |

|    |          |        |          |      |     |       |        |
|----|----------|--------|----------|------|-----|-------|--------|
| Rn | 1.20E-10 | 222.00 | 1.38E-23 | 6680 | 133 | 10.75 | 0.3574 |
| Fr | 2.60E-10 | 223.00 | 1.38E-23 | 6680 | 133 | 4.07  | 0.9998 |
| Ra | 2.21E-10 | 226.00 | 1.38E-23 | 6680 | 133 | 5.28  | 0.9995 |
| Ac | 1.95E-10 | 227.00 | 1.38E-23 | 6680 | 133 | 5.17  | 0.9991 |
| Th | 1.80E-10 | 232.00 | 1.38E-23 | 6680 | 133 | 6.31  | 0.9899 |
| Pa | 1.80E-10 | 231.00 | 1.38E-23 | 6680 | 133 | 5.89  | 0.9942 |
| U  | 1.75E-10 | 238.00 | 1.38E-23 | 6680 | 133 | 6.19  | 0.9938 |
| Np | 1.75E-10 | 237.00 | 1.38E-23 | 6680 | 133 | 6.27  | 0.9899 |
| Pu | 1.75E-10 | 239.00 | 1.38E-23 | 6680 | 133 | 6.03  | 0.9900 |
| Am | 1.75E-10 | 243.00 | 1.38E-23 | 6680 | 133 | 5.97  | 0.9892 |
| Cm | 1.74E-10 | 247.00 | 1.38E-23 | 6680 | 133 | 5.99  | 0.9892 |

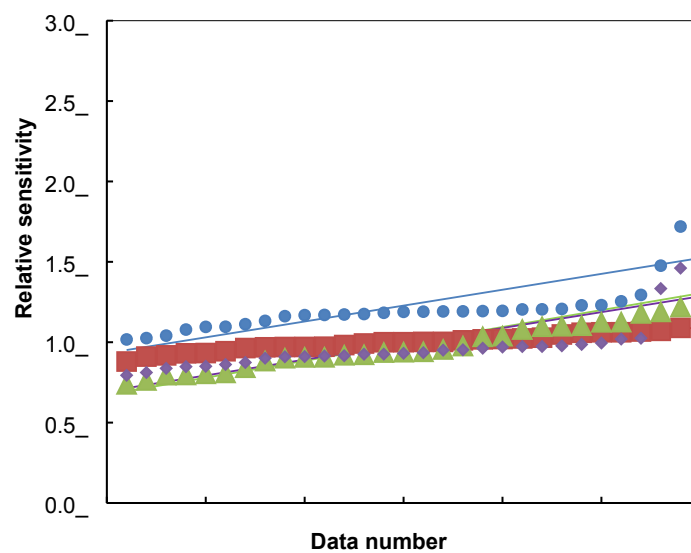

S2 Signal variation rate for each element in the presence of carbon. (in ascending order)

- After regression correction with ICP-index (Standard deviation 0.056, Relative standard deviation 5.6 %), ▲ After regression correction with 1st IP (Standard deviation 0.231, Relative standard deviation 23.1 %), ◆ After regression correction with atomic mass (Standard deviation 0.275, Relative standard deviation 27.5 %), ● Signal variation of all 30 elements (Average rate 1.240, Standard deviation 0.279, Relative standard deviation 22.5 %).

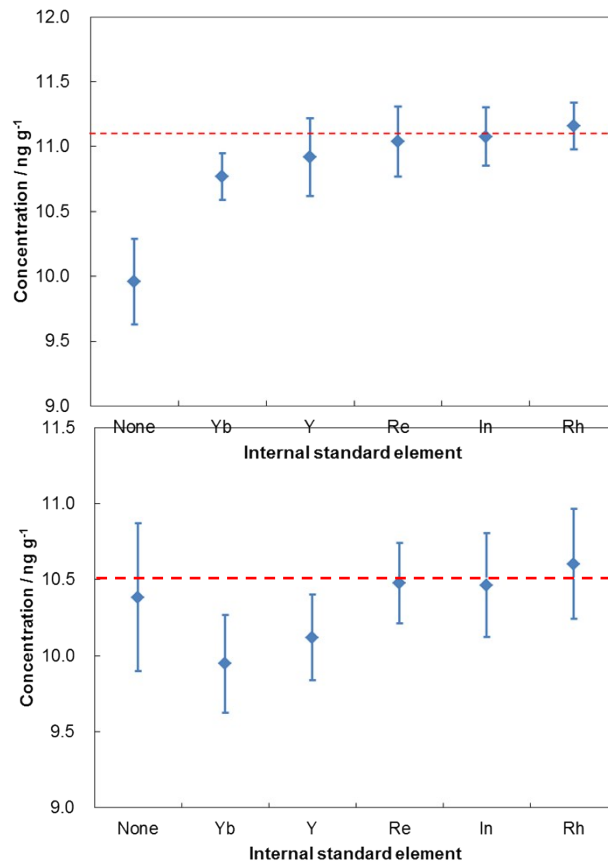

| Element | ICP-index of K | Element | ICP-index of Mg |
|---------|----------------|---------|-----------------|
| K       | 3.31           | Yb      | 2.75            |
| Yb      | 4.11           | Y       | 3.43            |
| Y       | 5.08           | Re      | 4.55            |
| Re      | 6.52           | In      | 4.74            |
| In      | 6.53           | Rh      | 5.61            |
| Rh      | 7.93           | Mg      | 9.44            |
| As      | 34.98          | As      | 27.66           |

S3 Internal standard element dependence in the measurement of As in a matrix of K and Mg.

(Upper figure) K 100 mg kg<sup>-1</sup> matrix, (Lower figure) Mg 100 mg kg<sup>-1</sup> matrix, Red dotted line: Calculation value, X-axis: None indicates no internal standard correction, Yb, Y, Re, In, and Rh were corrected as internal standard elements, Bar: Standard uncertainty in the measurement (*n*=3)

S4 ICP-index list of Ar for all elements. (calculated values: in atomic number order)

| Element | ICP-index             | Element | ICP-index          | Element | ICP-index |
|---------|-----------------------|---------|--------------------|---------|-----------|
| H       | $1.43 \times 10^5$    | As      | 21.33              | Tb      | 1.71      |
| He      | $2.09 \times 10^{13}$ | Se      | 39.86              | Dy      | 1.70      |
| Li      | 3.45                  | Br      | 535.17             | Ho      | 1.74      |
| Be      | 16.04                 | Kr      | $8.44 \times 10^3$ | Er      | 1.76      |
| B       | 26.41                 | Rb      | 0.98               | Tm      | 1.83      |
| C       | 970.06                | Sr      | 1.89               | Yb      | 1.86      |
| N       | $1.33 \times 10^5$    | Y       | 2.21               | Lu      | 1.66      |
| O       | $1.51 \times 10^5$    | Zr      | 2.47               | Hf      | 2.27      |
| F       | $4.99 \times 10^7$    | Nb      | 2.70               | Ta      | 2.76      |
| Ne      | $2.43 \times 10^8$    | Mo      | 3.06               | W       | 3.09      |
| Na      | 2.49                  | Tc      | 3.38               | Re      | 3.23      |
| Mg      | 6.12                  | Ru      | 3.59               | Os      | 4.22      |
| Al      | 6.78                  | Rh      | 3.87               | Ir      | 6.06      |
| Si      | 11.50                 | Pd      | 4.56               | Pt      | 6.22      |
| P       | 55.23                 | Ag      | 4.30               | Au      | 8.33      |
| S       | 162.71                | Cd      | 5.86               | Hg      | 14.64     |
| Cl      | 544.36                | In      | 3.41               | Tl      | 3.25      |
| Ar      | $2.89 \times 10^5$    | Sn      | 5.02               | Pb      | 4.08      |
| K       | 1.29                  | Sb      | 8.09               | Bi      | 4.71      |
| Ca      | 2.75                  | Te      | 11.62              | Po      | 7.05      |
| Sc      | 3.22                  | I       | 40.81              | At      | 13.97     |
| Ti      | 3.62                  | Xe      | 254.81             | Rn      | 24.09     |
| V       | 3.75                  | Cs      | 0.69               | Fr      | 0.86      |
| Cr      | 3.98                  | Ba      | 1.25               | Ra      | 1.49      |
| Mn      | 4.67                  | La      | 2.14               | Ac      | 1.82      |
| Fe      | 5.26                  | Ce      | 2.34               | Th      | 2.57      |
| Co      | 5.57                  | Pr      | 1.37               | Pa      | 2.39      |
| Ni      | 5.73                  | Nd      | 1.92               | U       | 2.62      |
| Cu      | 6.09                  | Pm      | 1.95               | Np      | 2.67      |
| Zn      | 9.41                  | Sm      | 1.50               | Pu      | 2.56      |
| Ga      | 4.83                  | Eu      | 1.59               | Am      | 2.53      |
| Ge      | 7.90                  | Gd      | 1.69               | Cm      | 2.55      |

S5 ICP-index list of Li for all elements. (calculated values: in atomic number order)

| Element | ICP-index             | Element | ICP-index          | Element | ICP-index |
|---------|-----------------------|---------|--------------------|---------|-----------|
| H       | $1.94 \times 10^5$    | As      | 23.79              | Tb      | 2.33      |
| He      | $1.83 \times 10^{13}$ | Se      | 41.32              | Dy      | 2.31      |
| Li      | 7.01                  | Br      | 522.28             | Ho      | 2.36      |
| Be      | 26.80                 | Kr      | $7.81 \times 10^3$ | Er      | 2.37      |
| B       | 37.51                 | Rb      | 1.59               | Tm      | 2.45      |
| C       | 1152.87               | Sr      | 2.84               | Yb      | 2.46      |
| N       | $1.36 \times 10^5$    | Y       | 3.26               | Lu      | 2.18      |
| O       | $1.35 \times 10^5$    | Zr      | 3.58               | Hf      | 2.91      |
| F       | $3.94 \times 10^7$    | Nb      | 3.85               | Ta      | 3.47      |
| Ne      | $1.77 \times 10^8$    | Mo      | 4.24               | W       | 3.81      |
| Na      | 4.49                  | Tc      | 4.58               | Re      | 3.92      |
| Mg      | 9.79                  | Ru      | 4.79               | Os      | 5.07      |
| Al      | 9.59                  | Rh      | 5.06               | Ir      | 7.17      |
| Si      | 15.60                 | Pd      | 5.86               | Pt      | 7.27      |
| P       | 68.26                 | Ag      | 5.45               | Au      | 9.64      |
| S       | 186.79                | Cd      | 7.27               | Hg      | 16.74     |
| Cl      | 569.94                | In      | 4.15               | Tl      | 3.53      |
| Ar      | $2.74 \times 10^5$    | Sn      | 5.83               | Pb      | 4.39      |
| K       | 2.32                  | Sb      | 8.91               | Bi      | 4.86      |
| Ca      | 4.54                  | Te      | 12.12              | Po      | 7.04      |
| Sc      | 5.10                  | I       | 40.94              | At      | 13.46     |
| Ti      | 5.55                  | Xe      | 244.25             | Rn      | 22.20     |
| V       | 5.62                  | Cs      | 1.08               | Fr      | 1.16      |
| Cr      | 5.85                  | Ba      | 1.83               | Ra      | 1.88      |
| Mn      | 6.70                  | La      | 2.80               | Ac      | 2.17      |
| Fe      | 7.41                  | Ce      | 2.98               | Th      | 2.93      |
| Co      | 7.66                  | Pr      | 1.98               | Pa      | 2.73      |
| Ni      | 7.81                  | Nd      | 2.55               | U       | 2.94      |
| Cu      | 8.05                  | Pm      | 2.58               | Np      | 2.99      |
| Zn      | 12.23                 | Sm      | 2.10               | Pu      | 2.87      |
| Ga      | 6.05                  | Eu      | 2.20               | Am      | 2.83      |
| Ge      | 9.36                  | Gd      | 2.33               | Cm      | 2.84      |

S6 ICP-index list of Pb for all elements. (calculated values: in atomic number order)



| Element | ICP-index             | Element | ICP-index          | Element | ICP-index |
|---------|-----------------------|---------|--------------------|---------|-----------|
| H       | $1.62 \times 10^5$    | As      | 37.89              | Tb      | 3.68      |
| He      | $1.82 \times 10^{13}$ | Se      | 69.08              | Dy      | 3.65      |
| Li      | 6.12                  | Br      | 902.62             | Ho      | 3.76      |
| Be      | 25.70                 | Kr      | $1.40 \times 10^4$ | Er      | 3.79      |
| B       | 38.88                 | Rb      | 2.05               | Tm      | 3.95      |
| C       | 1284.04               | Sr      | 3.88               | Yb      | 4.00      |
| N       | $1.63 \times 10^5$    | Y       | 4.51               | Lu      | 3.57      |
| O       | $1.72 \times 10^5$    | Zr      | 5.03               | Hf      | 4.85      |
| F       | $5.39 \times 10^7$    | Nb      | 5.48               | Ta      | 5.88      |
| Ne      | $2.51 \times 10^8$    | Mo      | 6.17               | W       | 6.56      |
| Na      | 4.65                  | Tc      | 6.79               | Re      | 6.83      |
| Mg      | 10.85                 | Ru      | 7.20               | Os      | 8.91      |
| Al      | 11.44                 | Rh      | 7.72               | Ir      | 12.76     |
| Si      | 19.10                 | Pd      | 9.08               | Pt      | 13.07     |
| P       | 88.56                 | Ag      | 8.54               | Au      | 17.47     |
| S       | 251.85                | Cd      | 11.61              | Hg      | 30.66     |
| Cl      | 814.34                | In      | 6.73               | Tl      | 6.70      |
| Ar      | $4.17 \times 10^5$    | Sn      | 9.78               | Pb      | 8.40      |
| K       | 2.55                  | Sb      | 15.50              | Bi      | 9.57      |
| Ca      | 5.28                  | Te      | 21.94              | Po      | 14.15     |
| Sc      | 6.17                  | I       | 75.70              | At      | 27.65     |
| Ti      | 6.90                  | Xe      | 466.07             | Rn      | 47.23     |
| V       | 7.14                  | Cs      | 1.52               | Fr      | 1.93      |
| Cr      | 7.53                  | Ba      | 2.70               | Ra      | 3.28      |
| Mn      | 8.82                  | La      | 4.46               | Ac      | 3.93      |
| Fe      | 9.88                  | Ce      | 4.83               | Th      | 5.49      |
| Co      | 10.44                 | Pr      | 2.95               | Pa      | 5.10      |
| Ni      | 10.70                 | Nd      | 4.03               | U       | 5.59      |
| Cu      | 11.35                 | Pm      | 4.10               | Np      | 5.68      |
| Zn      | 17.49                 | Sm      | 3.22               | Pu      | 5.46      |
| Ga      | 8.94                  | Eu      | 3.40               | Am      | 5.40      |
| Ge      | 14.34                 | Gd      | 3.64               | Cm      | 5.45      |
